# Supplementary material
Source: Royal Society of Chemistry journal article supplement (doi:10.1039/d6tb00792a)
Supplement: d6tb00792a1.pdf [file d6tb00792a1.pdf]

## *Supporting information*

### **Material and methods**

Forchlorfenuron, N-(2-chloro-4-pyridinyl)-N'-(3-hydroxyphenyl) (CAS: 76947-71-2), 1,3 -Diphenylurea, Diuron, Carbamazepine, Ketanserin, Pemigatinib (purity  $\geq$  99 %) were purchased from J&K Scientific Co., Ltd. (Beijing, China). Ovalbumin (OVA), Bovine albumin (BSA), and goat anti-mouse IgG were acquired through Sigma-Aldrich (St. Louis, MO, USA). Ethoxylated oleyl alcohol (On-870), polyethylene glycol (PEG, MW: 4000), and Tween 20 solution were supplied by Thermo Fisher Scientific Co., Ltd. (Shanghai, China). Sample pad, absorbent pad, conjugate pad and polyvinyl-chloride (PVC) backing card were provided by Kinbio Tech. Co., Ltd. (Shanghai, China). Nitrocellulose (NC) membranes were provided by Shenzhen BSK Industrial Co., Ltd. The portable colloidal gold immunoassay analyzer was obtained from Suzhou Helmen Precision Instruments Co., Ltd. (Jiangsu, China). The XYZ Platform Dispenser was acquired from Shanghai Kinbio Tech. Co., Ltd. (Shanghai, China). All animals were purchased from Home-SPF Biotechnology Co., Ltd. (Beijing, China). All experiments were approved by the Jiangnan University Animal Welfare and Ethics Committee (JN.NO20251027B090181 [140]) and conducted in strict compliance with the EU Directive 2010/63 on the protection of animals used for scientific purposes.

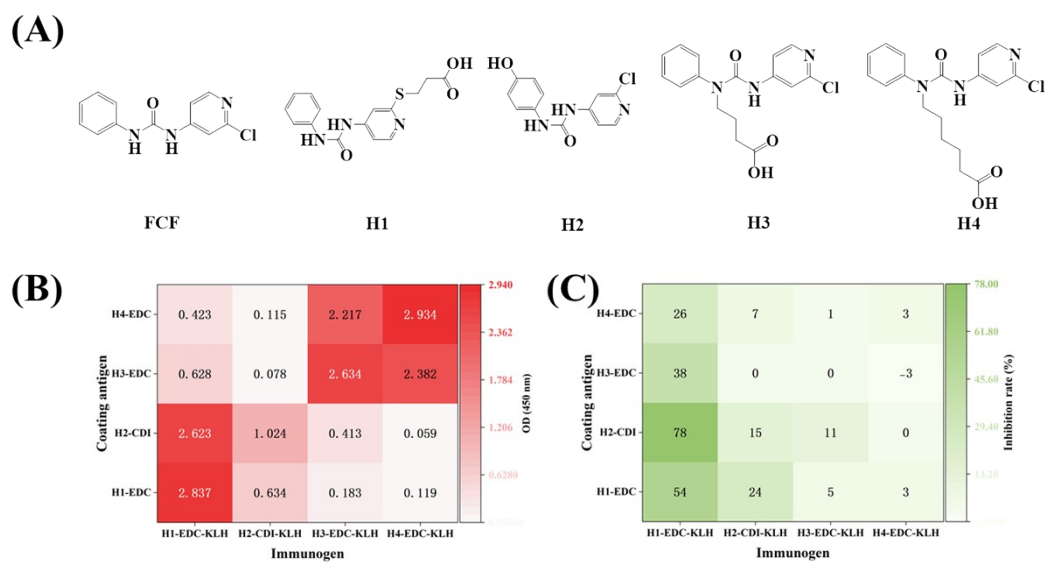

**Fig. S1.** (A) Structure of FCF and five designed haptens. The titers (B) and inhibition rates (C) of different immunogens under different coating antigens were determined.

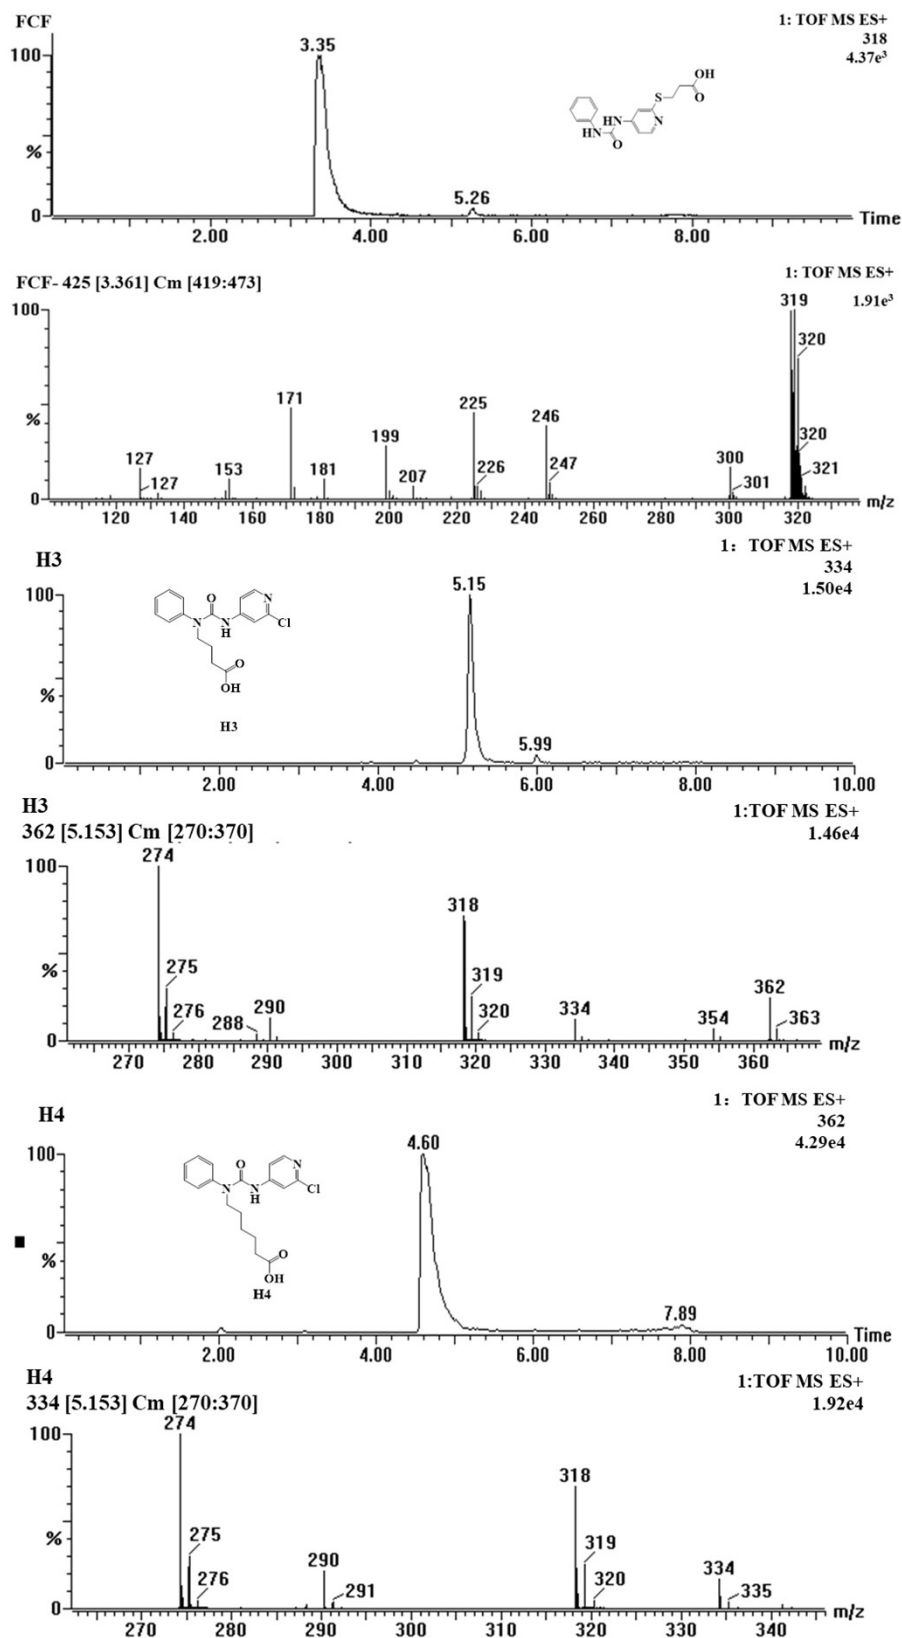

**Fig. S2.** Verify the structure of the H1, H3 and H4 by LC-MS/MS.

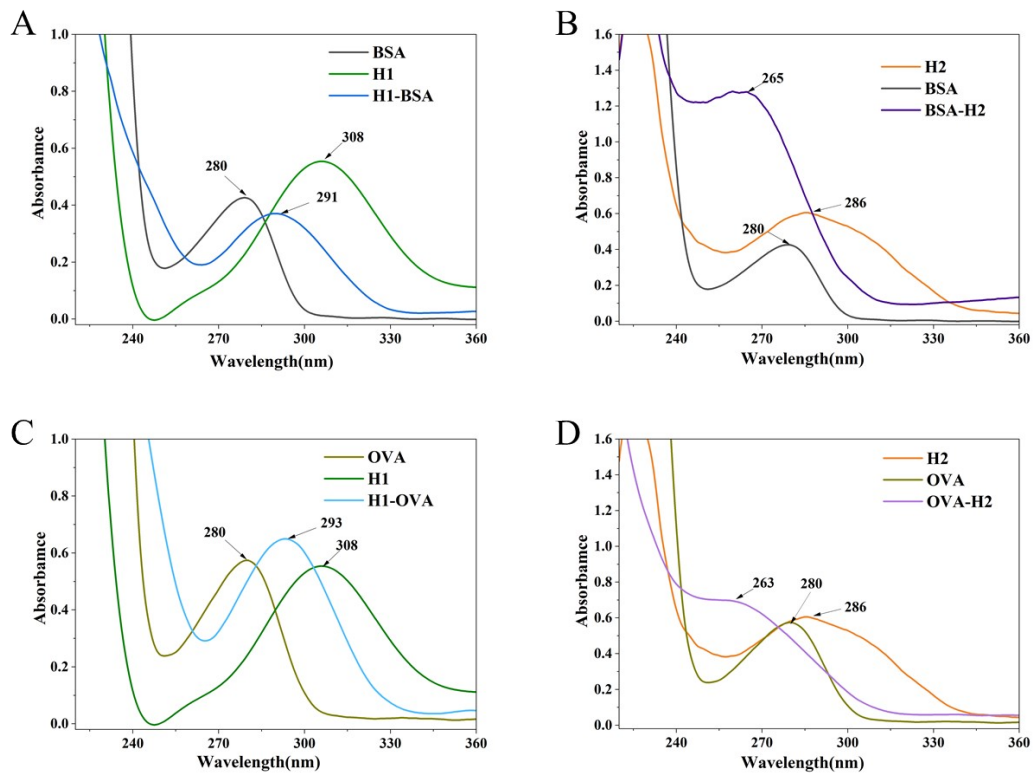

**Fig. S3.** The result of UV-Vis spectroscopy characterization of FCF antigens.

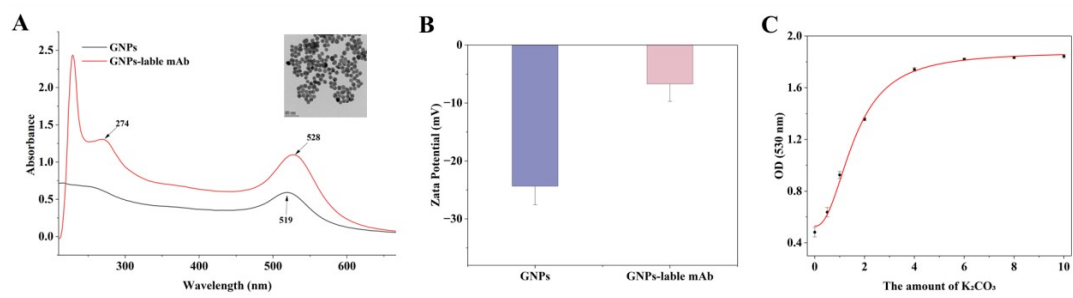

**Fig. S4.** Characterization data of AuNPs and AuNPs-mAb.

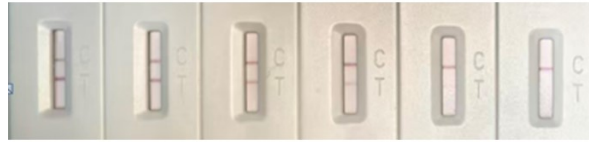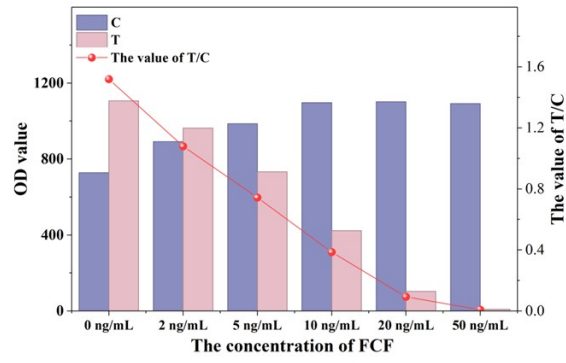

**Fig. S5.** Performance of single T-line ICA.

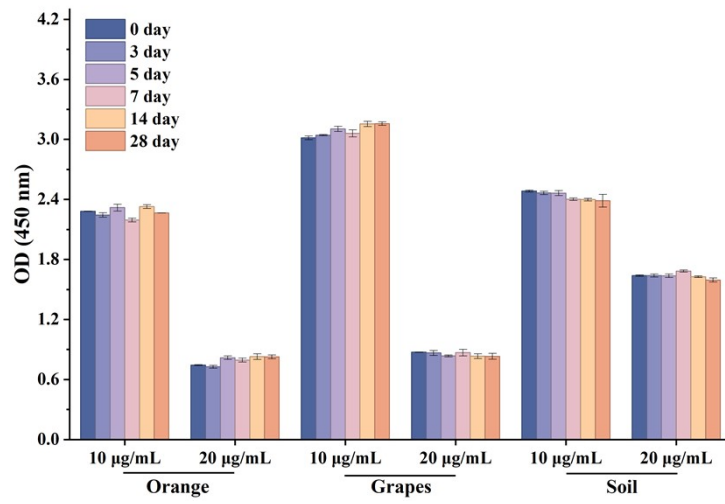

**Fig. S6.** Effects of storage time on the output data of ICA.

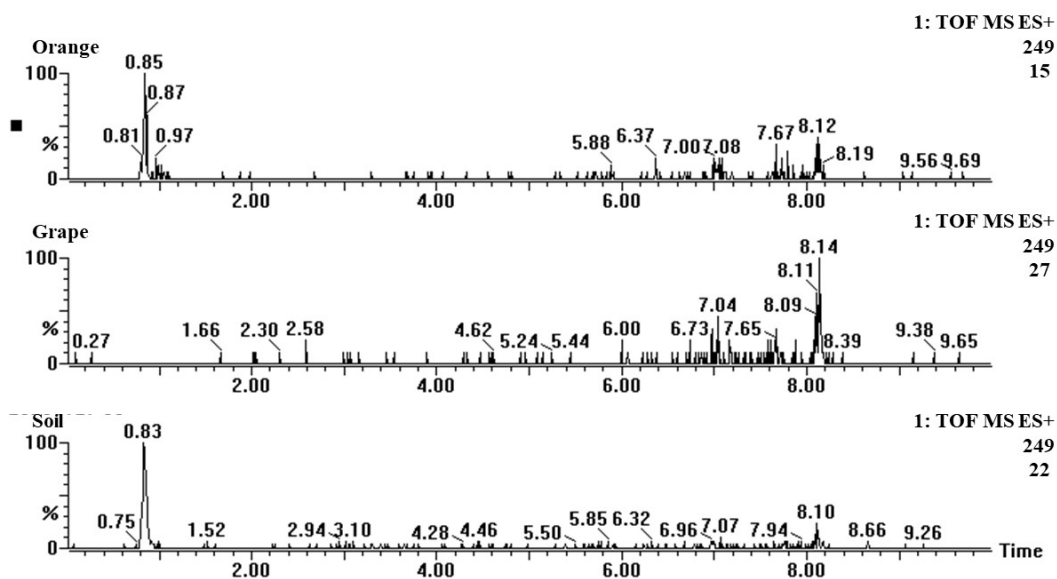

Fig. S7. Analysis negative samples by LC-MS.

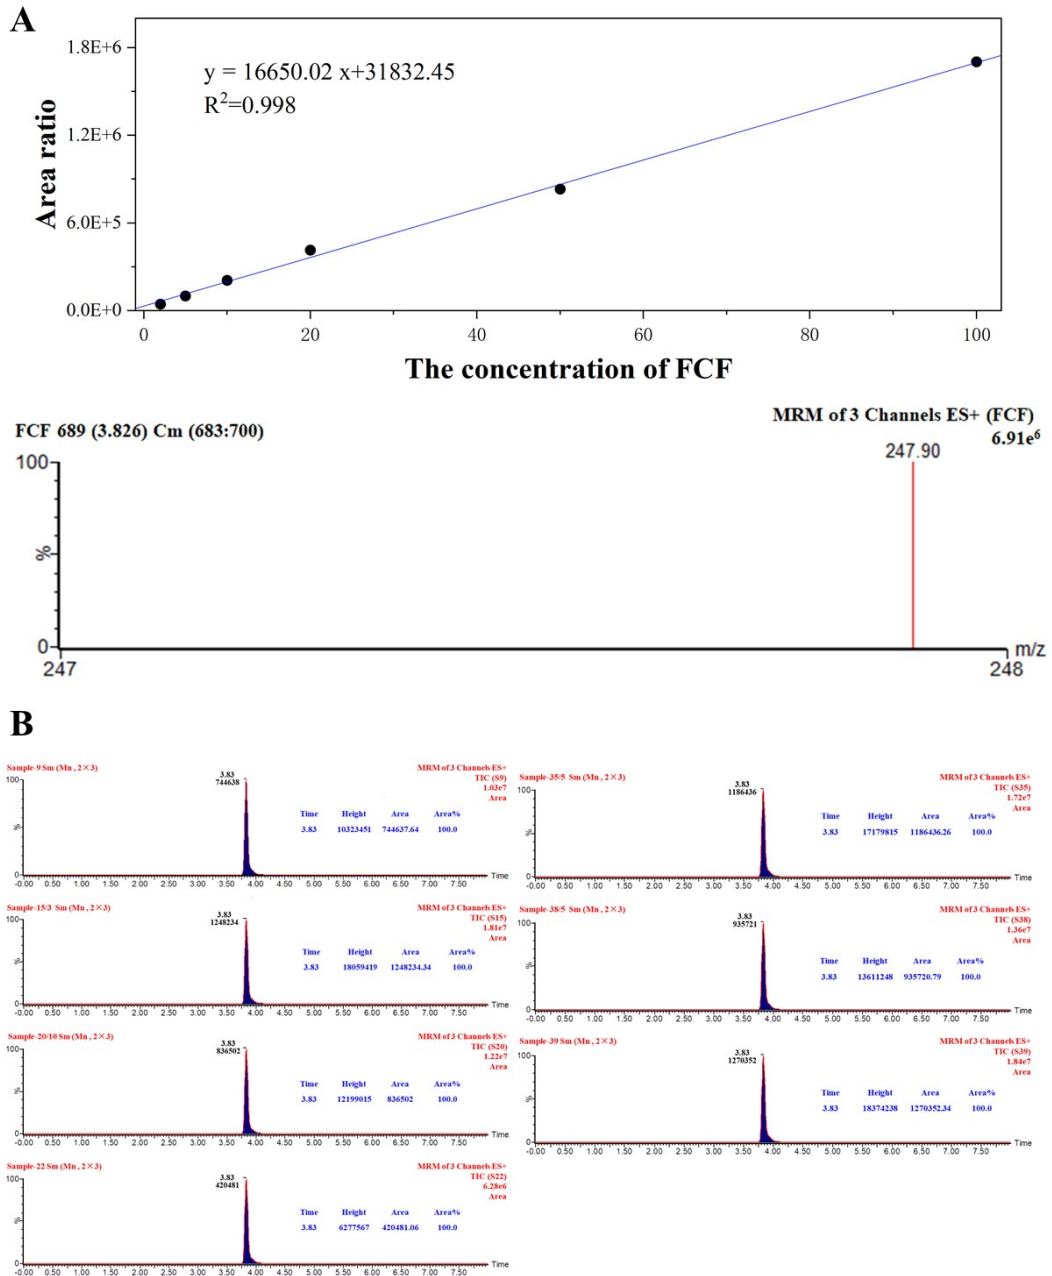

**Fig. S8.** Analysis positive samples by LC-MS.

**Table. S1.** Cross-reactivity of structural analogues.

| Analogs             | Structure                                                                            | IC50<br>(ng/mL) | CR (%) |
|---------------------|--------------------------------------------------------------------------------------|-----------------|--------|
| Forchlorfenuron     | 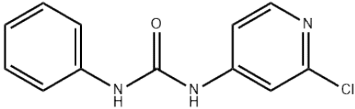    | 0.10086         | 100    |
| 1,3 -Diphenylurea   |     | 10.854          | 0.93   |
| Thidiazuron         |     | 64.292          | 0.16   |
| 6-benzylaminopurine |    | >100            | <0.1   |
| Gibberellic acid    |   | >100            | <0.1   |
| Brassinolide        |   | >100            | <0.1   |
| Carbamazepine       |   | >100            | <0.1   |
| Ketanserin          |  | >100            | <0.1   |

---

Pemigatinib

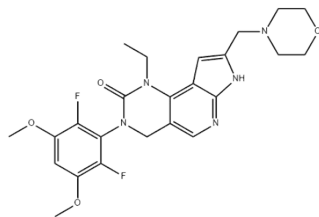

>100

<0.1

---

**Table. S2.** Recovery of FCF in different samples by the Immunochromatographic assay strip and LC-MS/MS (n = 3).

| Samples    | Spiked value of target<br>( $\mu\text{g}/\text{kg}$ ) | Immunochromatographic assay strip           |          |      | LC-MS/MS                                    |          |      |
|------------|-------------------------------------------------------|---------------------------------------------|----------|------|---------------------------------------------|----------|------|
|            |                                                       | Detection value ( $\mu\text{g}/\text{kg}$ ) | Recovery | CV   | Detection value ( $\mu\text{g}/\text{kg}$ ) | Recovery | CV   |
|            |                                                       | Mean                                        | (%)      | (%)  | Mean                                        | (%)      | (%)  |
| Orange     | 0                                                     | ND                                          | NC       | NC   | ND                                          | NC       | NC   |
|            | 5                                                     | $4.928 \pm 0.075$                           | 98.57    | 1.53 | $4.950 \pm 0.082$                           | 98.99    | 1.65 |
|            | 20                                                    | $22.015 \pm 1.078$                          | 110.08   | 4.90 | $21.801 \pm 2.332$                          | 109.00   | 9.14 |
|            | 200                                                   | $192.340 \pm 2.162$                         | 96.17    | 1.12 | $206.543 \pm 3.833$                         | 103.27   | 1.86 |
| FCF Grapes | 0                                                     | ND                                          | NC       | NC   | ND                                          | NC       | NC   |
|            | 5                                                     | $5.059 \pm 0.056$                           | 101.19   | 1.10 | $4.945 \pm 0.06$                            | 98.90    | 1.20 |
|            | 20                                                    | $20.363 \pm 1.063$                          | 101.81   | 5.22 | $20.513 \pm 0.634$                          | 102.57   | 3.09 |
|            | 200                                                   | $202.421 \pm 3.834$                         | 101.21   | 1.89 | $193.704 \pm 4.581$                         | 96.85    | 2.36 |
| Soil       | 0                                                     | ND                                          | NC       | NC   | ND                                          | NC       | NC   |
|            | 5                                                     | $5.245 \pm 0.111$                           | 104.89   | 2.12 | $4.978 \pm 0.144$                           | 99.55    | 2.89 |
|            | 20                                                    | $18.450 \pm 0.531$                          | 92.25    | 2.88 | $22.576 \pm 1.912$                          | 112.88   | 8.47 |
|            | 200                                                   | $205.333 \pm 6.825$                         | 102.67   | 3.32 | $207.224 \pm 1.965$                         | 103.61   | 0.95 |

<sup>a</sup> ND, not detectable.<sup>b</sup> NC, not calculated.

**Table. S3.** Types of real samples (n = 5).

| Serial Number   | Types of Samples |
|-----------------|------------------|
| No. 1 ~ No. 11  | Orange Samples   |
| No. 12 ~ No. 27 | Grapes samples   |
| No. 28 ~ No. 40 | Soil Samples     |
